# Supplementary material for: Cervical Length and Uterocervical Angle for Optimal Timing in Predicting Preterm Birth among Twin Pregnancies: A Longitudinal Study
Source: Research Square preprint supplement (doi:10.21203/rs.3.rs-8505360/v1), 2026-01-16
Supplement: Supplementary file 1 [file 5534a90d62e24df70c2195ec.xlsx]

## Sheet: Hieu BV_data
ID	Patient name	Petient ID	GA_at_Delivery	Address	Year_of_Birth	Occupation	Height_cm	Weight_kg	Weight_14w	Weight_16w	Weight_18w	Weight_20w	Weight_22w	Weight_24w	Para_Vaginal_Birth	Para_Cesarean	History_Preterm_Birth	History_Pregnancy_Disease	History_Miscarriage	History_Gyn_Disease	History_Gyn_Intervention	Current_Pregnancy_Type	Twin_Type	Current_Pregnancy_Pathology	Delivery_Mode	Reason_for_Delivery	Fetal_Weight_1	Fetal_Weight_2	CL_14w	CL_16w	CL_18w	CL_20w	CL_22w	CL_24w	UCA_14w	UCA_16w	UCA_18w	UCA_20w	UCA_22w	UCA_24w	Preterm_Birth_Before_34w	Preterm_Birth_Before_37w	Os_Cervical_14w	Prophylaxis_14w	Physical_Activity_14w	Hospitalization_14w	Os_Cervical_16w	Prophylaxis_16w	Physical_Activity_16w
53	Bui Thuy D	845230901	37	2	2001	2	160	57	58	59.5	59.5	59.5	60	61	0	0	0	0	2	0	0	2	2	0	2	1	2400	2400	39.3	41.6	36.9	32.7	22.3	23.8	90	97	110	103.84	92.46	113	0	0	1	3	1	1	1	0	0
72	Nguyen Thi H	354569510	37	2	1993	1	153	47	48	48	49	50	51	52	0	0	0	0	0	0	0	2	3	0	2	1	3100	2700	30	32.8	35.7	30.6	29.47	32.35	75	71.08	120	90.46	80	75	0	0	1	0	0	0	1	0	0
49	Bui Thi Thu T	974641895	37	2	1995	2	155	45	46	47.5	48	49	50	51	0	0	0	0	1	0	0	2	3	0	2	1	2300	2500	34.3	38	37.5	38.5	30.06	23.08	97	102	105.74	110	132	155	0	0	1	0	0	0	1	0	0
70	Do Thi C	973086098	37	2	1998	1	157	50	50	50.5	51	51.5	52	54	0	0	0	0	1	0	0	2	3	0	2	1	2800	2400	25.6	32.2	34.8	34.89	31.6	46.5	90	92.22	90.69	132.33	88.69	65.46	0	0	1	3	1	1	1	1	0
15	Tran Thi L	896110865	37	1	1994	1	160	56.5	57.5	60	61	62.5	64	66	0	0	0	0	0	0	0	2	2	0	2	1	2600	3000	36.1	35.2	30.3	29.5	31.7	30.9	96.9	127.5	78	67.5	128.52	98	0	0	1	3	1	1	2	1	1
80	Nguyen Thi N	936074647	37	2	1989	1	160	46	47	48	48	49	49.5	50.5	2	0	0	0	0	0	0	2	2	3	2	1	2300	2400	36	30.4	32.3	30.4	32.6	29.7	156	96.12	119.13	112.98	97.49	105.15	0	0	1	0	0	0	1	0	0
46	Pham Thi Thu T	971942966	37	2	1994	1	164	58	58.5	60	61	61.5	63	64	0	0	0	0	0	0	0	2	3	0	2	1	2600	2750	39.5	43.8	40	35.8	32.6	33.4	100.26	158.63	114.17	90	77.72	70.98	0	0	1	0	0	0	1	0	0
82	Pham Thi T	353212959	37	2	1984	1	156	49	49.5	50	51	51.5	52.5	54.5	1	0	0	0	0	0	0	2	3	0	2	1	3100	3000	46.2	40.9	37.6	35.9	32.8	32	130.24	146.87	110.75	120.5	100.03	68.94	0	0	1	0	0	0	1	0	0
62	Pham Thanh Tam	939431991	37	1	1991	2	160	50	51	51.5	53	53	53.5	54	1	0	0	0	0	0	0	1	3	0	2	1	2600	3000	34	33.9	33.6	31.4	32.8	37.8	92	102.77	92.33	96.31	100.79	112.8	0	0	1	0	0	0	1	0	0
29	Nguyen Thi Hoai V	982457651	37	2	1987	2	155	51	51	53	54	55	57	59	1	0	0	1	2	0	0	1	3	1	2	1	2400	2700	30.4	32.4	36.2	36.1	34	33.3	88.66	95	90	105	101.25	104.22	0	0	1	3	1	1	1	1	0
63	Nguyen Thi T	962790465	37	1	1997	2	160	50	51	51	52	53	54	54.5	0	1	0	0	0	0	0	1	3	1	2	1	2400	2200	45	44.6	41.7	40.5	34.4	36	76.52	99.01	110	100.16	80.45	62.61	0	0	1	0	0	0	1	0	0
22	Nguyen Thi Thu T	982300986	37	1	1986	2	154	53	53.5	54.5	56	56.5	58.5	60	0	0	0	0	0	0	0	2	3	0	2	1	2500	2700	30.6	33.6	33.7	33.2	34.6	35.6	92.04	101.09	85.98	74.36	71.8	82.74	0	0	1	1	1	0	1	1	0
7	Dinh Thu H	986372165	38	1	1989	3	158	63	65	67	68	69	71	71	0	0	0	0	0	2	2	2	3	1	2	1	2770	2780	37.2	38.2	43.4	39.9	35.1	34	86	97	95	102	112	85.98	0	0	1	1	0	0	1	1	0
47	Pham Thi Minh T	935565203	37	2	1989	3	155	52	53	54	55	55.5	56.5	57	0	0	0	0	0	0	0	2	3	0	2	1	2600	2400	31.6	35.6	46	46.3	35.2	33.4	65.12	80.55	95	116.96	84	77.91	0	0	1	3	1	1	1	0	0
50	Nguyen Thi Ngoc A	378757687	37	1	2000	2	160	51	51.5	53	53	54	54.5	56	1	0	0	0	1	0	0	1	3	0	2	1	1500	1700	30.4	31.7	32.8	32.2	35.2	40.7	75.02	120.38	109.09	90.69	87.34	71.07	0	0	1	1	0	0	1	0	0
13	Le Kim O	344665392	37	1	1992	2	164	62	63.4	66	67	67.5	69	71	1	0	0	0	0	0	0	2	3	0	2	1	2600	2500	36	37	37.5	35.79	35.79	37.2	75	153	131.59	117.42	110.41	92.13	0	0	1	0	0	0	1	0	0
57	Nguyen Thuy D	349846537	37	2	1990	1	159	48	49	49.5	51	51.5	52	52.5	1	0	0	0	0	0	0	2	3	1	2	1	1900	2500	43.5	34.3	38.6	38.6	36.2	39.3	84.1	120	114.42	75.5	70	75	0	0	1	1	0	0	1	1	0
17	Do Thi Thuy H	369513589	37	2	1988	1	158	50	50.5	52	53	54.6	56	58.5	0	0	0	0	0	0	0	2	3	0	2	1	2700	2800	34.3	20.4	40.7	39.5	36.4	37	153.17	109.11	102.48	72.07	65.67	51.21	0	0	1	1	1	0	2	3	1
24	Le Thuy N	906010490	37	2	1990	1	160	52	53	54.5	56	57.5	58.5	60	0	0	0	0	0	0	0	2	3	0	2	1	2200	2300	26.9	28.5	29.4	31.2	36.5	44.2	88.55	85.59	91.28	96.13	100.72	96.01	0	0	1	0	0	0	2	1	1
81	Phan Thi N	974159821	37	2	1992	2	155	50	51	52	52	53	53.5	54	0	0	0	0	0	0	0	2	3	0	2	1	3100	3100	45.9	43.2	40.1	31.1	36.6	38.5	125.95	110.1	95.24	74.5	66.71	68.96	0	0	1	0	0	0	1	0	0
6	Phan Thi Thu H	777389745	37	2	1990	2	160	52.5	53	53.5	54.5	55	56.5	57.5	0	0	0	0	0	0	0	2	3	1	2	1	2400	2300	35	36.4	37.7	39.1	37	30.6	124.28	121.88	97.41	96.57	81	103	0	0	1	1	0	0	1	1	1
52	Pham Thi V	888462093	37	2	1990	3	154	52	53	54	54	54	55	56	0	0	0	0	0	0	0	1	3	0	2	1	2600	2600	30.4	31.2	29.3	34	37.5	41.4	74.71	138.46	108.55	93.23	87.26	69.24	0	0	1	1	0	0	1	0	0
37	Nguyen Thi Lan C	795343438	37	1	2000	2	160	48	49	49	50.5	51	51	52	1	0	0	0	0	0	0	2	3	0	2	1	2420	2860	36.56	40	43.5	39.8	37.7	36.3	98	78	80.25	115.3	107.29	74.66	0	0	1	0	0	0	1	0	0
51	Lam Thi Thuy L	936619428	37	2	1991	3	153	48	49	50	51	51	53	54.5	0	0	0	0	1	0	0	1	3	0	2	1	2200	2300	33.4	35.5	37.6	37.9	38.6	45.8	44.51	67.5	50	52.48	70	49.94	0	0	1	0	0	0	1	0	0
31	Nguyen Thi D	815483656	37	2	1989	2	150	48	49	52	53.5	55	58	58	1	0	0	0	0	0	0	2	3	0	2	1	3200	2900	38.2	37.8	36.8	40	39	37.6	81.97	82.87	119.01	115	101.54	96.19	0	0	1	0	0	0	1	0	0
35	Dinh Thi L	395512750	37	2	1978	1	158	63	64	67	67.5	67.5	68	68.7	0	0	0	0	0	2	2	2	3	1	2	1	2000	1900	42.6	40.4	37.9	38.2	39	38.6	115	106	104.22	101.72	88.49	84.76	0	0	1	0	0	0	1	0	0
83	Vu Thi Phuong U	399418888	37	2	1996	2	164	61	61	62	63	63	63.5	64	0	0	0	0	1	0	0	2	3	1	2	1	2500	2700	37.5	38.19	37.72	37.33	39	40.5	90	102	119.75	82	108	89.56	0	0	1	0	0	0	1	2	1
61	Bui Thi Kim A	941418224	37	2	1993	3	151	52	53	53	54	54.5	54.5	55	0	0	0	0	0	0	0	2	3	0	2	1	2500	2800	49.8	45.8	42.5	39.7	39.2	38.8	85.51	80.09	78.46	68.94	63.91	60.72	0	0	1	0	0	0	1	0	0
88	Dinh Thi Thu P	985904383	37	2	1990	2	153	48	49	50	50.5	51	52	53.5	1	0	0	0	0	0	0	2	3	0	2	1	2800	2900	37.9	27.8	39.2	42	40	44.7	142	77.71	134.5	110	90.06	84.91	0	0	1	0	0	0	1	1	1
75	Ha Thi Huyen N	919104566	38	1	1994	2	153	48	48	49	49	50	51.5	52	1	0	0	0	0	0	0	2	3	0	2	1	3100	2900	39.4	39.7	43.8	41.6	40.1	44	90	101.7	98.32	79.59	84.9	51.87	0	0	1	0	0	0	1	0	0
12	Bui Thi Tra M	902816293	37	1	1988	2	152	54	54.8	56.5	58	59	60.5	63	1	0	0	3	3	0	0	2	3	0	2	1	2500	2700	43.9	44.6	38	33	40.3	45.4	91	108.45	90	97.77	78.45	76	0	0	1	0	0	0	1	0	0
74	Do Thi Mai O	985479919	37	2	1993	1	160	50	50	51	52	52.5	54	54	0	1	0	0	0	0	0	2	3	0	2	1	2500	2700	41.86	34.85	30.3	32.8	41	35	101	110	57.32	45.76	85	70	0	0	1	0	0	0	1	0	0
18	Vu Thi Thanh T	906196319	38	2	1991	1	155	58	59	61.5	62	63.5	64	65	0	0	0	0	0	0	0	2	3	1	2	1	2700	3000	41.6	38.3	44.4	42	41.3	42.9	92.87	53.87	86	87	76.62	71.63	0	0	1	0	0	0	1	0	0
8	Bui Thi Thuy D	936832389	37	2	1991	3	171	62.5	63	65	66	67.5	69	69	0	0	0	0	2	0	0	2	3	0	2	1	2800	2500	40	41	36	31	41.4	42.3	95	108	110	95	92	89	0	0	1	0	0	0	1	0	0
19	Dang Thi Thu T	936807328	37	2	1990	1	155	47	48	51	53	54	54.5	56	1	0	0	3	0	0	0	2	3	0	2	1	2200	2600	41	38.9	32.6	39.9	41.4	47	84	95	107	140	140	92	0	0	1	0	0	0	1	0	0
33	Mai Thi Thu T	968252402	38	2	1994	1	160	47	48	51	52	53.5	54	54.6	0	0	0	0	0	1	1	2	3	0	2	1	1600	1600	33.2	33	37.3	41	41.6	36	94.64	95	116.78	133.12	144.7	126	0	0	1	0	0	0	1	0	0
27	Nguyen Thi B	763703160	37	2	1997	1	161	57	57	59	59	60.5	61.5	62	1	0	0	0	1	0	0	2	3	0	2	1	2500	2600	37.8	39	42.6	42.7	41.6	44.8	90.36	77.35	92.85	96	112.89	125.25	0	0	1	0	0	0	1	0	0
44	Le Thi N	835910696	38	2	1996	2	165	50	50.5	52	52	54	55	56	0	0	0	0	0	0	0	2	3	0	2	1	2700	2560	32.2	30	34.4	35.2	41.7	40.2	79.48	110.03	103.27	95.84	88.15	70.66	0	0	1	0	0	0	1	0	0
48	Le Thi Lan A	337936748	37	2	1999	3	156	53	54	56	57	58	60	61	0	0	0	0	0	0	0	2	3	0	2	1	2700	2550	36.2	34.5	31	34.67	41.8	37.4	113.82	85.72	69	97	128	116	0	0	1	0	0	0	1	0	0
39	Le Thi T	904148489	38	1	1989	1	168	68	68.5	69	70.5	70.5	71	72	0	1	0	0	0	0	0	2	3	0	2	1	2400	2600	45	48.2	41.6	43.2	41.8	41.2	122	117	146	110.1	102.9	124.49	0	0	1	0	0	0	1	0	0
16	Pham Minh T	944232455	38	1	1994	2	155	47	48	51	53	55	56.5	58	0	0	0	0	0	0	0	2	3	0	2	1	2600	2600	39	32.5	34	38	42	38.6	117	53.58	118	104	98.96	64.35	0	0	1	0	0	0	1	0	0
32	Pham Thi H	936933688	38	2	1987	2	159	62	63	65.5	66	66.7	67	67.7	0	0	0	0	0	0	3	2	2	0	2	1	3200	3000	39.9	40.1	40.7	46.7	42.2	41.9	96.13	100.12	105	146.25	89.94	80.53	0	0	1	0	0	0	1	0	0
26	Nguyen Thi Thu T	393677366	38	1	1992	2	155	57	62	64	65	66	67.5	70	0	0	0	0	0	0	0	2	3	0	2	1	2400	2900	30.3	34.6	35.7	42.9	42.4	46.8	89.3	94.46	91.76	72.32	88	94.04	0	0	1	0	0	0	1	0	0
40	Nguyen Thi L	395445688	38	1	1993	3	158	52	52	53	54	55	55	56	0	0	0	0	0	0	0	2	3	1	2	1	1900	2300	41.1	41.8	46.9	44.4	43.1	36.5	102	95	89	81	78.5	68	0	0	1	0	0	0	1	0	0
14	Chu Thi Phuong T	977984816	38	1	1987	1	163	49	50.2	56	56	57.5	58.5	60	1	0	0	0	2	0	0	2	3	0	2	1	2600	2800	47.6	41.9	40.8	30.9	44	39	120.67	116.4	117.96	120.26	123	138.44	0	0	1	0	0	0	1	0	0
11	Nguyen Thi Minh D	326922903	37	1	1995	2	162	55	56	58	58	59	61	64	0	0	0	0	1	0	0	1	3	2	2	1	2500	2300	32.1	35.8	39.6	41.7	44.8	49.8	79.06	117.42	114.53	111.61	90.3	85.51	0	0	1	0	0	0	1	0	0
69	Le Thi A	967729306	37	2	1996	1	155	47	48.5	49	49	50	51	51.5	0	0	0	0	0	3	0	1	3	1	2	1	2500	3100	40.1	54.3	51	38	46.04	42	110.5	114.46	90	124	90	91.77	0	0	1	0	0	0	1	0	0
38	Bui Van A	912245818	37	2	1989	2	158	49	50	51	52	53	53	53.5	1	0	0	0	0	0	0	2	3	0	2	1	3100	3000	33.1	36.5	36.8	43.3	46.2	45.6	98.08	100.72	119	118.38	130.24	113.07	0	0	1	0	0	0	1	0	0
5	Nguyen Thi G	862250292	37	2	1992	3	155	59	60	62	63	64.5	66	66	0	0	0	0	5	0	0	2	3	0	2	1	2700	2800	33.3	35	37.9	38.2	46.7	47.6	107.78	121.46	93.73	95	92.16	90.77	0	0	1	1	0	0	1	1	0
43	Ngo Thi Thuy T	906024379	37	1	1996	1	157	50	51	52	52	53	53.5	54	0	0	0	0	0	0	0	2	3	0	2	1	2600	2400	38	38	40.3	41.1	47.3	47	143	119	101.82	86.48	81.74	70.07	0	0	1	0	0	0	1	0	0
73	Bui Thanh H	986237970	37	2	1996	1	155	50	51	51.5	52	53	53.5	54	0	0	0	0	0	0	0	2	3	0	2	1	3000	3100	29.1	32.9	38	44.7	48.2	43.2	53.88	46.43	124.81	101.7	81.17	83.57	0	0	1	0	0	0	1	0	0
65	Vu Thi Hoa P	359195529	37	2	1993	3	155	48	50	50.5	51	52	52.5	53	2	0	0	3	0	0	0	2	3	1	2	1	2500	2600	43.2	45.4	46.9	48.5	49	50.4	159.95	106	100.96	94.89	98.02	108	0	0	1	0	0	0	1	0	0
4	Nguyen Thi Ngoc H	793298666	36	1	1996	3	164	79	79.5	81	81.7	83	85.5	87	0	0	0	0	1	3	0	2	3	1	2	1	2400	2500	31	28	34.1	29.2	21.3	32.4	95.62	74	132	112.74	105.42	68.42	0	1	1	2	1	1	1	1	1
25	Nguyen Yen N	569692576	36	1	2007	1	152	60	61	63	64.5	65	67	69.5	0	0	0	0	0	0	0	1	2	0	2	1	2100	2100	32.1	28.1	28	27.7	27	31.8	101.5	110.93	128.38	113.98	130	124.43	0	1	1	3	1	1	2	1	1
41	Vu Thi X	354855298	36	2	1997	3	157	43	43.5	44	44.5	45	46	47	1	0	0	0	1	0	0	1	3	3	2	1	1500	1500	35.2	38	31.4	31	29.3	28.3	57	143.18	94.53	93	85	95	0	1	1	0	0	0	1	0	0
77	Pham Thi T	369125688	35	2	1991	1	153	49	50	50.5	51	52	52.5	53	0	0	0	0	1	0	0	1	2	1	2	1	1900	2100	31	30.5	40.39	34.2	31.4	30.7	114.25	109.65	95	77.95	95	121	0	1	1	0	0	0	1	0	0
78	Nguyen Thu T	934325678	36	1	1990	1	157	60	60	61	62	62.5	63	64	0	0	0	0	2	0	0	2	3	0	2	1	2600	2600	46.2	36	34.3	30.9	32.2	6.4	155.44	122	116	120.26	92.22	155.59	0	1	1	0	0	0	1	0	0
68	Lo Seo V	369821825	35	2	1997	1	154	48	48	49.5	49.5	49.5	50	51	0	0	0	0	0	0	0	1	3	0	2	1	2500	2650	41.1	34.3	36	37.9	32.2	38.3	61.09	69.61	77.68	90	78.08	90	0	1	1	0	0	0	1	3	1
66	Le Thi H	969987569	36	1	1991	2	160	52	52.5	53	54	54.5	55	56	0	0	0	0	0	1	0	1	3	1	2	1	2000	2200	37	23.1	38.7	27	32.9	27	150	71.21	106.38	95	120	106	0	1	1	0	0	0	1	3	1
92	Mac Thi T	365995268	35	2	1995	1	162	50	51	51.5	52	53	53.5	54	0	0	0	0	0	0	0	2	3	3	2	1	2500	1900	41.6	42.4	37.9	36.6	33.3	27.2	92.87	120	145	132	130.7	115	0	1	1	0	0	0	1	0	0
55	Nguyen Thuy A	936657998	36	1	1991	3	163	55	55.5	56	57	57	57.5	58	1	0	0	0	0	0	0	1	2	0	2	1	2000	2000	45.8	38.2	37.8	37	34.2	33.8	80.09	81.79	120.57	113.44	114.65	116.36	0	1	1	0	0	0	1	0	0
91	Nguyen Thi H	788288932	36	2	1991	1	155	52	53	54	54.5	55	56	57	4	0	0	0	0	0	0	1	3	0	2	1	2500	2400	29.7	25.5	34.1	36.5	34.2	36	90.14	81	109.3	100.72	65.85	71.59	0	1	1	0	0	0	2	2	1
2	Ngo Thi H	988285538	34	2	1990	2	158	49	50	52.5	53	54.5	56	59	0	0	0	0	1	0	0	1	3	0	2	1	2200	2350	34.6	31.2	33.8	35.1	34.3	32.5	91	116	107.36	162	144.15	131	0	1	1	0	0	0	1	0	0
36	Quach Thi C	981727770	34	2	1996	1	155	51	51	51.5	52	52	53	54.5	0	0	0	0	0	0	0	2	3	0	2	1	2500	2000	23.2	33.9	35.2	36.1	34.3	32.9	114.19	106.24	97.55	99.46	113.65	124.03	0	1	2	3	1	1	1	1	0
64	Doan Thu T	981781080	35	2	1997	3	158	52	52.5	53.5	54	55	55	55	0	1	0	0	1	0	0	2	1	0	2	1	2100	2200	42.5	40.1	37.8	35.3	35	36.7	60.01	94.62	71.74	97.46	101	93.78	0	1	1	0	0	0	1	0	0
20	Nguyen Thi X	962686751	35	2	1991	1	165	58	59	62	63.5	65	65.5	67	0	0	0	0	0	0	0	2	3	0	2	1	2200	2300	31	33	39.5	37	30	30	101.6	118.8	72	94	97	109	0	1	1	0	0	0	1	0	0
76	Nguyen Huong G	936477117	36	2	1992	3	153	54	55	55	56	56.5	57	57	0	1	0	0	0	0	0	2	3	3	2	1	2300	2800	32.4	34.5	36.7	35	36	38.1	110	118	95	107	108	113	0	1	1	0	0	0	1	0	0
89	Pham Thu H	846103565	36	1	1988	2	160	48	48.5	49	50	52	53	54	0	1	0	0	0	0	0	2	3	0	2	1	2400	2700	31.2	38	34.8	36.2	36.6	36.5	105	92	125	108.5	95	85.82	0	1	1	0	0	0	1	0	0
71	Tran Ha T	901519398	36	1	1991	2	155	51	51.5	53	53	54	54.5	55	0	0	0	0	0	0	0	2	3	0	2	1	2500	2500	40.37	41	40.6	39.4	37	26.2	120	71.03	130	110	113.93	140.27	0	1	1	0	0	0	1	0	0
86	Cu Thi L	976299918	36	2	1995	2	160	50	50	51	52	53	53.5	55	0	0	0	0	0	0	0	1	3	0	2	1	2700	2200	33.5	35	40.77	35.4	37.58	33.09	78.54	112	122.3	125	103.42	108	0	1	1	0	0	0	1	0	0
23	Nguyen Hoang A	942945486	35	1	1996	1	160	58	59	61	62	63	64.5	66	0	1	0	3	0	0	0	1	3	0	2	1	2300	2400	42.5	40.1	37	36	38.3	34.2	112.96	90	85	84.82	82.5	63.23	0	1	1	0	0	0	1	0	0
28	Le Anh P	888669887	36	1	1992	1	157	55	55	57	58.5	60	61.7	63	0	0	0	0	1	0	0	2	3	1	2	1	3000	3000	37.7	32.9	34.2	30.3	39.3	45.4	97	123.75	100.52	103	101	108.81	0	1	1	0	0	0	1	0	0
21	Tran Thi Thu H	389509579	36	1	1996	2	160	74	74.5	77.5	79	80	81	83	0	1	0	0	0	3	0	1	3	0	2	1	2400	2500	36.8	38.6	39.5	41	40	40.2	65	81	66.58	57	61.8	89	0	1	1	0	0	0	1	0	0
56	Do Thi L	902023629	35	2	1988	3	155	50	51.5	53	54	54	55	56	1	0	0	0	0	0	0	1	2	0	2	1	2000	2200	41.9	42.4	41	43.6	40	42.6	107.27	120.41	123	104.85	102.48	95.43	0	1	1	0	0	0	1	0	0
67	Vu Thi Lan A	978948596	34	1	1996	1	155	46	46.5	47	48	49	49.5	51	1	0	0	0	0	0	0	2	3	0	2	1	2000	2000	40	37.8	37.5	38.2	40.2	40.6	93.23	95	100.23	120	107.45	123.21	0	1	1	0	0	0	1	0	0
79	Vu Thi N	973053890	35	2	1986	2	148	38	49	50	50	51	52	53	0	1	0	0	0	0	0	1	2	0	2	1	2200	2000	27	38	45.5	40.9	40.3	37.9	66.84	78.5	115.36	96.5	72.69	85.9	0	1	1	2	1	0	1	0	0
10	Ha Thu T	363835986	34	1	1997	2	156	49	51	54	55.6	56.5	58.5	58	0	0	0	0	1	0	0	1	3	2	2	1	1900	2100	49.8	37.3	29	38.4	41.2	37.2	97.13	100.27	102.49	145	124.5	133	0	1	1	0	0	0	1	0	0
84	Ngo Hang N	936717865	35	1	1993	1	166	65	65	66	66	66.5	67	68	0	0	0	0	0	0	0	2	3	3	2	1	2300	2800	29.9	30	34.2	30	43.1	31.2	94.29	67	84.25	82	68	82.05	0	1	1	0	0	0	1	0	0
87	Pham Thi Ngoc L	388526964	34	2	1984	2	155	46	47	48	48	50	50	51	1	0	0	0	0	0	0	2	3	3	2	1	2000	2100	41	27.7	34	39	43.3	42.8	95	113.98	125.5	120	128.8	97	0	1	1	0	0	0	1	2	1
45	Nguyen Thi My L	762446138	36	2	1993	2	160	52	52	53	54	54	55	56.5	1	0	0	0	0	0	0	2	3	3	2	1	2500	2300	35.2	38	43.5	43.9	43.8	44.3	95	143	105	135	124	105	0	1	1	3	1	1	1	0	0
1	Nguyen Thi Hai Y	349826739	35	1	1990	1	160	55	56	58	58.5	60	62	63	0	0	0	0	0	0	0	2	1	0	2	1	2600	2400	36	39.5	45	46.6	44.8	43.3	72.87	121	96.5	105.89	119.38	128.8	0	1	1	0	0	0	1	0	0
93	Mai Thi T	356086666	29	2	1997	2	162	53	53.5	55	60	56.5	57	57	1	0	0	0	0	0	0	1	3	0	2	1	1100	1300	29.7	27.5	32.5	14.8	12	12.2	85.47	86.03	125.32	131.41	127.36	131.17	1	1	1	2	1	0	1	2	1
90	Pham Thi V	984117508	30	2	1994	1	155	46	46.5	47	49	48.5	49	50	0	0	0	0	0	0	0	2	3	0	2	1	1300	1300	29.92	31.21	37.76	27.4	22.7	22.06	75	82	85	135.5	108	113.5	1	1	1	0	0	0	1	0	0
3	Vu Thi T	973284233	32	2	1994	2	157	47	47.5	49	49.5	51	53	54	0	0	0	0	0	0	0	2	3	0	2	1	1500	1800	38.1	34.6	29.9	29.4	28.4	28.4	84.09	86.74	93.14	96.78	107	117	1	1	1	3	1	1	1	1	1
42	Vu Thi H	976185852	31	2	1994	1	161	52	52	54	54.5	55	56	57.5	0	0	0	0	1	0	0	1	3	0	2	1	2400	2200	36.7	34.3	33.25	30.1	29.5	31.1	156.19	144	105	95.14	97.21	98.5	1	1	1	0	0	0	1	0	0
30	Pham Minh T	392303108	29	1	1991	1	150	56	56	58.5	60	62	65	67	2	0	0	0	0	0	0	1	2	0	2	1	1350	1400	33.4	31.17	31.8	31.4	30.3	25.2	82.54	85.85	91.29	94.53	110	115.96	1	1	1	3	1	1	1	1	0
9	Nguyen Thi Huong L	939841336	32	2	1988	2	160	55	56	68.5	69	70	72	72	0	0	0	0	0	0	0	2	3	1	2	1	1550	1900	45.3	44.7	37.6	35.7	31	25.8	42.8	68	87	92	124.85	126.88	1	1	1	1	0	0	1	1	0
85	Nguyen Thao V	868683934	31	2	2007	1	152	46	47	48	48.5	49	50	51	0	0	0	0	0	0	0	1	2	0	2	1	1700	1600	34.3	28.1	27	29	31.8	28	122.32	62.01	94.5	106	120.71	117.34	1	1	1	0	0	0	1	1	0
54	Vu Thi H	378474104	32	2	1994	2	154	44	45	46	47	47	48	48.5	0	1	0	0	0	0	0	2	2	0	2	1	1600	1600	29.8	37.3	33	36	33.9	32.4	55	122	98	97.61	103.36	83.07	1	1	2	1	0	0	1	0	0
34	Nguyen Thi H	374880893	32	1	1993	1	180	70	70.5	70.5	71	72	72.5	73	0	0	0	0	0	0	3	2	3	1	2	1	2500	2700	31.8	29.5	28.6	28.2	21	27.9	102.99	108.15	102.41	126.62	98.7	100	1	1	1	3	1	1	1	1	0
58	Nguyen Thi M	347731351	31	2	1997	2	155	48	49	49	50	50.5	51	52	0	0	0	0	0	0	0	2	3	0	2	1	1500	1700	46.6	37.7	37.2	35.2	38.4	38.3	105.89	86.2	71.45	78.9	110.9	137.38	1	1	1	0	0	0	1	0	0
59	Nguyen Thi D	766303269	33	2	2004	1	154	52	53	53	54	55	55.5	56	0	0	0	0	0	1	0	2	3	0	2	1	2200	2000	33.57	35.8	34.2	38.4	39.4	40.7	78.54	90	110.22	125.37	127.04	138	1	1	1	0	0	0	1	0	0
60	Nguyen Thi Thuy T	822257668	31	2	2001	1	160	43	43.5	44	44	45	46	47	0	0	0	0	0	0	0	2	3	0	2	1	1500	1500	43.9	36.3	38.7	36	28	38.7	72	87	131	90	119.33	125.11	1	1	1	0	0	0	1	0	0
	```
[truncated: 20 more columns]
